# Supplementary material for: Filamentous fungal pellets as a novel and sustainable encapsulation matrix for exogenous bioactive compounds
Source: Royal Society of Chemistry journal article supplement (doi:10.1039/d3fo04425d), 2024-01-01
Supplement: d3fo04425d1.pdf [file d3fo04425d1.pdf]

Supplementary materials

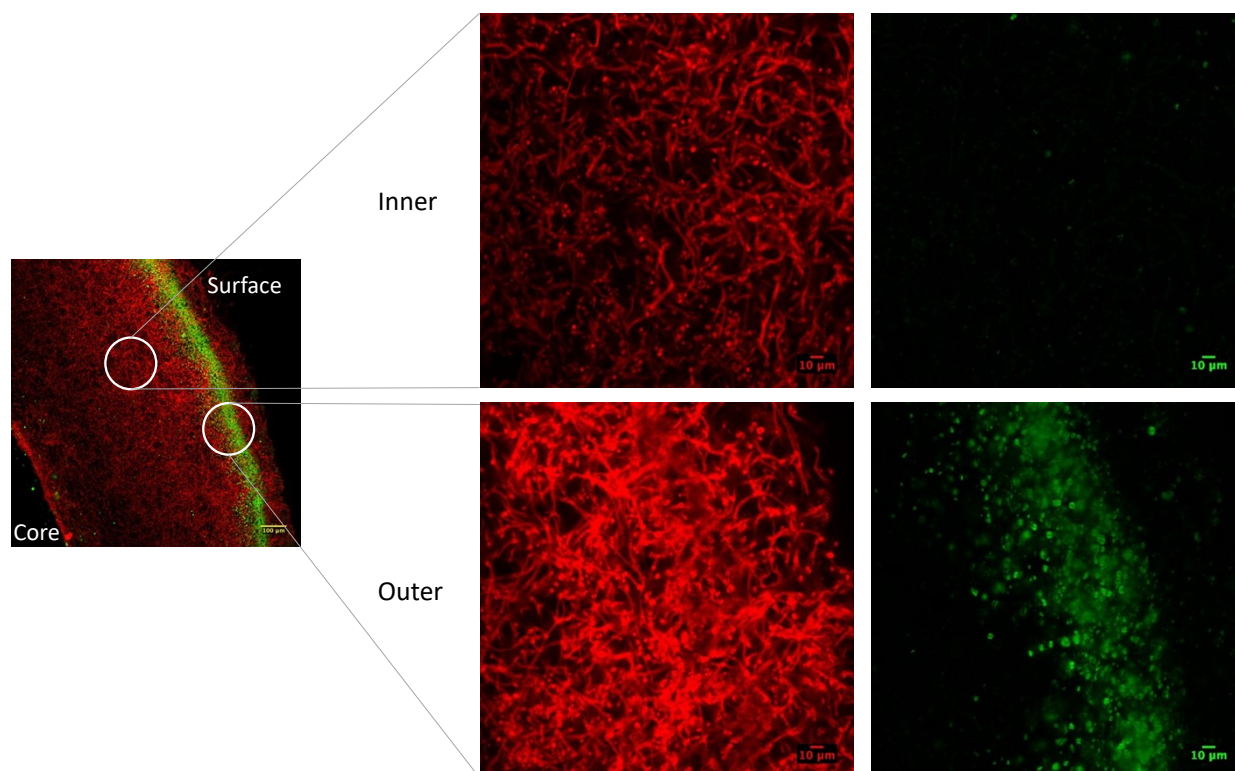

**Figure S1: Distribution of curcumin (green) in YE/FP-c (fungal hyphae cell wall was stained with Congo red) after the small intestinal digestion phase (40x magnification).**

**Table S1: Fitted zero order<sup>a</sup> and first order<sup>b</sup> model parameters to the release of curcumin from FP-c and YE/FP-c after 30 min into the *in vitro* intestinal phase, plus the model fitting RMSE and correlation coefficients.**

| Encapsulation system | Model       | Rate (k, 10 <sup>-3</sup> min <sup>-1</sup> ) | 95% CI of k (10 <sup>-3</sup> min <sup>-1</sup> ) | RMSE   | Correlation |
|----------------------|-------------|-----------------------------------------------|---------------------------------------------------|--------|-------------|
| FP-c                 | Zero order  | 2.11                                          | [1.79, 2.45]                                      | 0.017  | 0.988       |
|                      | First order | 3.76                                          | [3.44, 4.08]                                      | 0.0098 | 0.996       |
| YE/FP-c              | Zero order  | 0.784                                         | [0.593, 0.975]                                    | 0.010  | 0.970       |
|                      | First order | 1.22                                          | [1.03, 1.41]                                      | 0.0095 | 0.972       |

<sup>a</sup> Zero order model:  $M_t = M_0 + kt$

<sup>b</sup> First order model:  $M_t = M_0(1 - e^{-kt})$

$M_t, M_0$  are the cumulative release at time  $t$  and time 0.
